# Supplementary material
Source: PubMed Central journal article supplement (PMC4712067)
Supplement: NIHMS748308-supplement-Supplement1.pdf [file NIHMS748308-supplement-Supplement1.pdf]

## Supplementary Appendix

This appendix has been provided by the authors to give readers additional information about their work.

Supplement to: Redfield MM, Anstrom KJ, Levine JA, et al. Isosorbide mononitrate in heart failure with preserved ejection fraction. *N Engl J Med* 2015;373:2314-24. DOI: 10.1056/NEJMoa1510774

(PDF updated December 11, 2015.)

## SUPPLEMENTARY APPENDIX

**Manuscript:** Effect of Isosorbide Mononitrate on Activity Tolerance in Heart Failure with Preserved Ejection Fraction

**Corresponding Author:** Margaret M Redfield, MD

### Contents

|                                                                                                                                           |    |
|-------------------------------------------------------------------------------------------------------------------------------------------|----|
| NEAT-HFpEF Trial Members, Investigators and Committees .....                                                                              | 2  |
| SUPPLEMENTAL METHODS.....                                                                                                                 | 3  |
| Table S1: Complete inclusion and exclusion criteria for the NEAT-HFpEF study.....                                                         | 4  |
| Table S2: Characterization of patients meeting entry Criteria .....                                                                       | 6  |
| Table S3: Entry criteria of NEAT-HFpEF and recent trials in heart failure with preserved ejection fraction.....                           | 7  |
| Table S4: Baseline characteristics of participants in NEAT-HFpEF and recent trials in heart failure with preserved ejection fraction..... | 9  |
| Figure S1. The NEAT-HFpEF accelerometer device.....                                                                                       | 11 |
| Figure S2. Consort Diagram and Study Drug Administration.....                                                                             | 12 |
| Figure S3. CORRELATION BETWEEN The TWO ACTIVITY MONITORS USED IN THE NEAT-HFpEF accelerometer device.....                                 | 12 |
| SUPPLEMENTARY APPENDIX References.....                                                                                                    | 14 |

## NEAT-HFPEF TRIAL MEMBERS, INVESTIGATORS AND COMMITTEES

In addition to the Writing Committee, the following individuals participated in the NEAT-HFpEF study:

**HFN Member Clinical Centers**—*Boston V.A. Healthcare System*: N. Lakdawala, S. Ly; *Brigham and Women's Hospital*: M. Givertz, S. Anello, K. Brooks; *Christiana Care Health Services*: M. Saltzberg, A. Herman; *Cleveland Clinic Foundation*: R. Starling, T. Fonk; *Duke University Medical Center*: P. Adams, A. Mbugua; *Emory University Hospital*: J. Butler, A. Smith, G. Snell, N. Spiliadis, T. Dickson; *Johns Hopkins Hospital*: A. Bacher; *Lancaster General Hospital*: M. Etter, S. Pointer; *Massachusetts General Hospital*: D. Cocca-Spofford, K. Verkouw; *Mayo Clinic*: J. Gatzke, S. Milbrandt, S. Cho; *Metro Health System*: M. Dunlap, P. Leo, J. Nichols; *Northwestern Memorial Hospital*: H. Mkrdichian, C. Sanchez; *Temple University Hospital*: R. Alvarez, F. McGonagle; *Thomas Jefferson University Hospital*: D. Whellan, M. McCarey, B. Gallagher, K. Murphy; *Tufts Medical Center*: G. Huggins, G. Jamieson, A. Cronkright; *University Hospitals Case Medical Center*: G. Oliveira, M. Scheutzw, T. Semene; *University of Pennsylvania Health System*: T. Cappola, K. Margulies, C. Damon; *University of Utah Hospital/George E. Wahlen V.A. Medical Center*: J. Nativi-Nicolau, J. Gibbs, M. Johnson; *University of Vermont Medical Center*: M. Rowen, P. Van Buren; *Washington University School of Medicine*: V. Davila-Roman, D. Mann, J. Flanagan, M. Wells, D. Whitehead. **HFN Data and Safety Monitoring Board** – D.Vaughan (Chair), R. Agarwal, J. Ambrose, K. Kennedy, M. Johnson, J. Parrillo, M. Penn, M. Powers, E. Rose; **Protocol Review Committee** – W. Abraham (Chair), R. Agarwal, J. Cai, D. McNamara, J. Parrillo, M. Powers, E. Rose, D. Vaughan, R. Virmani; **Biomarker Core Lab** – *University of Vermont*: R.Tracy; **Echo Core Lab** - *Duke University Medical Center*: F. Alenezi, A. DeVore, H-K. Kim; **Coordinating Center** – *Duke Clinical Research Institute*: A. Hernandez, M.A. Sellers, P. Monds, T. Atwood, K. Hwang, T. Haddock; **NHLBI Representatives** – P. Desvigne-Nickens, K. Cooper-Arnold.

## **SUPPLEMENTAL METHODS**

### **ACCELEROMETER BASED ACTIVITY MEASUREMENT**

Patients were supplied with an elastic, hip worn belt outfitted with two Kinetic Activity Monitors (KAMs, Kersh Health, Plano, Texas) containing high-sensitivity, tri-axis, silicon micro-machined accelerometers (model KXUD9-2050, Kionix, Ithaca, NY) (Figure S1 below). Acceleration sensing is based on the principle of differential capacitance. Differential capacitance results from acceleration-induced motion of a silicon sense element and is measured in three dimensions (x, y and z axes). When the patient wears the accelerometer, body movement causes the silicon sense element to shift in position, changing capacitance, which is measured as changes in voltage. The cumulative vector of the three capacitances in three dimensions for each body movement is expressed as arbitrary accelerometer units.

### **ACCELEROMETER ANALYTIC METHODS**

The threshold for activity (15 minute cumulative vector magnitude value  $> 50$ ) as defined in the primary manuscript equates to walking at 1.0 mph for one minute or 0.5 mph for four minutes interspersed with sedentary status over the 15-minute epoch. Even when wearers are sedentary, the effect of breathing and shifting in sitting/lying position is evident as low level accelerometer units (AU). In contrast, if the accelerometer is left on a surface (table, counter, chair, floor etc), the 15 minute cumulative vector magnitude values are zero unless the surface itself is moved. The threshold for not wearing the accelerometer was set at a 15 minute cumulative vector magnitude value  $< 5$ , present for at least four consecutive 15 minute periods. The accelerometer core laboratory (Mayo Clinic, Rochester, MN and Scottsdale, AZ) processed the data, prepared the devices, down-loaded and processed the raw data and supplied the cleaned raw data to the data coordinating center.

**TABLE S1: COMPLETE INCLUSION AND EXCLUSION CRITERIA FOR THE NEAT-HFpEF STUDY**

**INCLUSION CRITERIA**

1. Age  $\geq$  50 years
2. Symptoms of dyspnea (NYHA class II-IV) without evidence of a non-cardiac or ischemic explanation for dyspnea
3. EF  $\geq$  50% as determined on imaging study within 12 months of enrollment with no change in clinical status suggesting potential for deterioration in systolic function
4. Stable medical therapy for 30 days as defined by:
  - No addition or removal of ACE, ARB, beta-blockers, calcium channel blockers (CCBs) or aldosterone antagonists
  - No change in dosage of ACE, ARBs, beta-blockers, CCBs or aldosterone antagonists of more than 100%
5. One of the following within the last 12 months
  - Previous hospitalization for HF with radiographic evidence of pulmonary congestion (pulmonary venous hypertension, vascular congestion, interstitial edema, pleural effusion) **or**
  - Catheterization documented elevated filling pressures at rest (LVEDP $\geq$ 15 mmHg or PCWP $\geq$ 20 mmHg) or with exercise (PCWP $\geq$ 25 mmHg) **or**
  - Elevated NT-proBNP ( $>$  400 pg/ml) or BNP ( $>$  200 pg/ml) **or**
  - Echo evidence of diastolic dysfunction / elevated filling pressures (**at least two**)
    - E/A  $>$  1.5 + decrease in E/A of  $>$  0.5 with Valsalva maneuver
    - Deceleration time  $\leq$  140 ms
    - Pulmonary vein velocity in systole  $<$  diastole (PVs $<$ PVd) (sinus rhythm)
    - E/e' $\geq$ 15
    - Left atrial enlargement ( $\geq$  moderate)
    - Pulmonary artery systolic pressure  $>$  40 mmHg
    - Evidence of left ventricular hypertrophy
      - LV mass/BSA  $\geq$  96 (♀) or  $\geq$  116 (♂) g/m<sup>2</sup>
      - Relative wall thickness  $\geq$  0.43 (♂ or ♀)
      - Posterior wall thickness  $\geq$  0.9 (♀) or 1.0 (♂) cm
6. No chronic nitrate therapy or infrequent ( $\leq$  1x week) use of intermittent sublingual nitroglycerin within last 3 months
7. Ambulatory (not wheelchair / scooter / walker / cane dependent)
8. HF is the primary factor limiting activity as indicated by answering # 2 to the following question:

My ability to be active is most limited by:

  1. Joint, foot, leg, hip or back pain
  2. Shortness of breath and/or fatigue and/or chest pain
  3. Unsteadiness or dizziness
  4. Lifestyle, weather, or I just don't like to be active

9. Body size allows wearing of the accelerometer belt as confirmed by ability to comfortably fasten the test belt provided for the screening process (belt designed to fit persons with BMI 20-40 Kg/m<sup>2</sup> but belt may fit some persons outside this range)
10. Willingness to wear the accelerometer belt for the duration of the trial
11. Willingness to provide informed consent

### **EXCLUSION CRITERIA**

1. Recent (< 3 months) hospitalization for HF
2. Hemoglobin < 8.0 g/dl
3. Glomerular filtration rate < 20 ml/min/1.73 m<sup>2</sup> on most recent clinical laboratories
4. SBP < 110 mmHg or > 180 mmHg at consent
5. Diastolic blood pressure < 40 mmHg or > 100 mmHg at consent
6. Resting HR > 110 bpm at consent
7. Previous adverse reaction to nitrates necessitating withdrawal of therapy
8. Chronic therapy with phosphodiesterase type-5 inhibitors (intermittent use of phosphodiesterase type-5 inhibitors for erectile dysfunction is allowable if the patient is willing to hold for the duration of the trial)
9. Regularly (> 1x per week) swims or does water aerobics
10. Significant COPD thought to contribute to dyspnea
11. Ischemia thought to contribute to dyspnea
12. Documentation of previous EF < 50%
13. Acute coronary syndrome within 3 months defined by electrocardiographic changes and biomarkers of myocardial necrosis (e.g. troponin) in an appropriate clinical setting (chest discomfort or anginal equivalent)
14. Percutaneous coronary intervention, coronary artery bypass grafting or new biventricular pacing within past 3 months
15. Primary hypertrophic cardiomyopathy
16. Infiltrative cardiomyopathy (amyloid)
17. Constrictive pericarditis or tamponade
18. Active myocarditis
19. Complex congenital heart disease
20. Active collagen vascular disease
21. More than mild aortic or mitral stenosis
22. Intrinsic (prolapse, rheumatic) valve disease with moderate to severe or severe mitral, tricuspid or aortic regurgitation
23. Acute or chronic severe liver disease as evidenced by any of the following: encephalopathy, variceal bleeding, INR > 1.7 in the absence of anticoagulation treatment
24. Terminal illness (other than HF) with expected survival of less than 1 year
25. Enrollment or planned enrollment in another therapeutic clinical trial in the next 3 months.
26. Inability to comply with planned study procedures
27. Pregnant women

**TABLE S2: CHARACTERIZATION OF PATIENTS MEETING ENTRY CRITERIA**

The NEAT-HFpEF case report forms did not collect data regarding which “objective evidence of heart failure in the last year” entry criteria were met. However, data on HF hospitalizations in the 12 months prior to enrollment, core laboratory NT-proBNP levels *at enrollment* and core laboratory echocardiographic data *at enrollment* are available. Of enrolled patients, 95 (86%) had a heart failure hospitalization in the last year, an elevated NT-proBNP level at enrollment or rigorous Doppler criteria indicative of elevated filling pressures at enrollment. Of note, four of the highest enrolling centers routinely obtain invasive assessment of hemodynamics at rest or with exercise in the evaluation of patients with heart failure with preserved ejection fraction and studies have shown that a significant subset of symptomatic patients with heart failure with preserved ejection fraction have normal NT-proBNP and/or resting Doppler diastolic indices but markedly abnormal filling pressures at rest or with exercise<sup>1,2</sup>.

|                                                                                            |                | N           |                                     |
|--------------------------------------------------------------------------------------------|----------------|-------------|-------------------------------------|
| HF hospitalization in last year AND Core Lab NT-proBNP $\geq$ 400 pg/ml at enrollment      |                | 11          |                                     |
| HF hospitalization in last year AND Core Lab NT-proBNP < 400 pg/ml at enrollment           |                | 10          |                                     |
| No HF hospitalization in last year AND Core Lab NT-proBNP $\geq$ 400 pg/ml at enrollment   |                | 24          |                                     |
| No HF hospitalization in last year AND Core Lab NT-proBNP < 400 pg/ml at enrollment (n=65) |                |             |                                     |
| Doppler variable                                                                           | Abnormal value | N with data | N with abnormal value at enrollment |
| Medial E/e'                                                                                | $\geq$ 15      | 62          | 39                                  |
| LA volume index (ml/m <sup>2</sup> )                                                       | $\geq$ 42      | 55          | 30                                  |
| PASP (mmHg)                                                                                | $\geq$ 40      | 28          | 10                                  |
| E/A                                                                                        | $\geq$ 1.5     | 62          | 10                                  |
| Deceleration time (ms)                                                                     | $\leq$ 140     | 64          | 5                                   |
| <b>At least one abnormal value at enrollment</b>                                           |                | N=50        |                                     |

**TABLE S3: ENTRY CRITERIA OF NEAT-HFPEF AND RECENT TRIALS IN HEART FAILURE WITH PRESERVED EJECTION FRACTION**

|                                                        | NEAT-HFpEF<br>(n=110)                                                                                                                                | ALDO DHF <sup>3</sup><br>(n=422)                      | RELAX <sup>4</sup><br>(n=216)                                                                                          | TOPCAT<br>Americas Subset <sup>5</sup><br>(n=1767)                             | PARAMOUNT<br>LCZ696 Subset <sup>6</sup><br>(n=152)                                  |
|--------------------------------------------------------|------------------------------------------------------------------------------------------------------------------------------------------------------|-------------------------------------------------------|------------------------------------------------------------------------------------------------------------------------|--------------------------------------------------------------------------------|-------------------------------------------------------------------------------------|
| <b>Primary Endpoint</b>                                | Accelerometer assessed activity                                                                                                                      | Peak VO <sub>2</sub> E/e'                             | Peak VO <sub>2</sub>                                                                                                   | Outcomes (CV death, cardiac arrest or HF hospitalization)                      | Change in NT-proBNP at 12 weeks                                                     |
| <b>Key Secondary Endpoints</b>                         | Six Minute Walk<br>KCCQ, MLHFQ<br>NT-proBNP levels                                                                                                   | Six Minute Walk<br>MLHFQ<br>NT-proBNP levels          | Six Minute Walk<br>MLHFQ<br>NT-proBNP levels                                                                           | All cause death and hospitalization                                            | Quality of Life<br>Echo Variables                                                   |
| <b>Entry Criteria</b>                                  |                                                                                                                                                      |                                                       |                                                                                                                        |                                                                                |                                                                                     |
| Clinical diagnosis of HF                               | NYHA II-IV                                                                                                                                           | NYHA II-III                                           | NYHA II-IV                                                                                                             | NYHA II-IV                                                                     | NYHA II-III                                                                         |
| Ejection Fraction                                      | ≥ 50%                                                                                                                                                | ≥ 50%                                                 | ≥ 50%                                                                                                                  | ≥ 45%                                                                          | ≥ 45%                                                                               |
| Objective evidence of HF                               | HF Hsp in last year<br><i>or</i><br>NT-proBNP (BNP) > 400(200) in last year<br><i>or</i><br>Invasive Hemodynamics*<br><i>or</i><br>Echo DD Grade ≥2‡ | Echo DD Grade ≥1‡<br><i>or</i><br>Atrial Fibrillation | HF Hsp in last year<br><i>or</i><br>Invasive Hemodynamics*<br><i>or</i><br>Left Atrial Enlargement + Loop Diuretic Use | HF Hsp in last year<br><i>or</i><br>NT-proBNP (BNP) > 360(100) in last 60 days | Signs or symptoms of HF (dyspnea, orthopnea, paroxysmal nocturnal dyspnea or edema) |
| <b>Screening Criteria (Must be met at Study Entry)</b> |                                                                                                                                                      |                                                       |                                                                                                                        |                                                                                |                                                                                     |
|                                                        | Patient self identifies HF symptoms (rather than neurologic, orthopedic or behavioral factors) limit activity on screening questionnaire             | Peak VO <sub>2</sub> < 25 mL/kg/min                   | Peak VO <sub>2</sub> < 60% predicted for age and sex<br><i>and</i><br>NT-proBNP(BNP) > 400(200)†                       | None                                                                           | NTproBNP > 400 pg/ml<br><i>and</i><br>Diuretic therapy                              |

\* At heart catheterization, elevated left ventricular end diastolic pressure (15 mmHg or greater) at rest or pulmonary capillary wedge pressure at rest (20 mmHg or greater) or with exercise (25 mmHg or greater)

†Patients with an NT-proBNP(BNP) < 400(200) on screening assessment could be enrolled if they had been previously documented to have elevated filling pressures\* at the time an NT-proBNP(BNP) level was < 400(200).

‡ Grade I diastolic dysfunction (DD) requires evidence of impaired relaxation without evidence of elevated filling pressures; Grade II DD requires evidence of elevated filling pressures.



Abbreviations: HF, heart failure; Hsp, hospitalization; KCCQ, Kansas City Cardiomyopathy Questionnaire; MLHFQ, Minnesota Living with Heart Failure Questionnaire; NYHA, New York Heart Association; Peak VO<sub>2</sub>, peak oxygen consumption at cardiopulmonary exercise test; CV, cardiovascular; E/e', ratio of early transmitral filling velocity to early diastolic medial mitral annular tissue velocity on Doppler examination

**TABLE S4: BASELINE CHARACTERISTICS OF PARTICIPANTS IN NEAT-HFpEF AND RECENT TRIALS IN HEART FAILURE WITH PRESERVED EJECTION FRACTION**

|                                                   | NEAT-HFpEF<br>(n=110) | ALDO DHF <sup>3</sup><br>(n=422) | RELAX <sup>4</sup><br>(n=216) | TOPCAT Americas Subset <sup>5</sup><br>(n=1767) | PARAMOUNT LCZ696 Subset <sup>6</sup><br>(n=152) |
|---------------------------------------------------|-----------------------|----------------------------------|-------------------------------|-------------------------------------------------|-------------------------------------------------|
| Age-yr                                            | 69                    | 67                               | 69                            | 72                                              | 71                                              |
| Female sex – %                                    | 57%                   | 52%                              | 48%                           | 50%                                             | 57%                                             |
| Body Mass Index – kg/m <sup>2</sup>               | 35                    | 29                               | 33                            | 33                                              | 30                                              |
| <b>Functional measures</b>                        |                       |                                  |                               |                                                 |                                                 |
| NYHA class II                                     | 53%                   | 86%                              | 47%                           | 59%                                             | 81%                                             |
| NYHA class III                                    | 45%                   | 14%                              | 53%                           | 35%                                             | 19%                                             |
| KCCQ clinical score (higher better)               | 59                    | NA                               | NA                            | 60                                              | NA                                              |
| MLHFQ total Score (lower better)                  | 44                    | 22                               | 43                            | NA                                              | NA                                              |
| Six minute walk distance - meters                 | 325                   | 530                              | 308                           | NA                                              | NA                                              |
| Peak VO <sub>2</sub>                              | NA                    | 16.4                             | 11.7                          | NA                                              | NA                                              |
| <b>Physical examination</b>                       |                       |                                  |                               |                                                 |                                                 |
| Systolic blood pressure - mmHg                    | 128                   | 135                              | 126                           | 129                                             | 136                                             |
| Heart rate – beats/min                            | 68                    | 65                               | 69                            | 68                                              | 69                                              |
| Elevated jugular venous pressure-%                | 34%                   | NA                               | 45%                           | 18%                                             | NA                                              |
| Edema – %                                         | 60%                   | 39%                              | 58%                           | 72%                                             | NA                                              |
| <b>Medical History and Medications</b>            |                       |                                  |                               |                                                 |                                                 |
| Heart failure hospitalization                     | 25%                   | 37%                              | 37%                           | 55%                                             | 40%                                             |
| Hypertension                                      | 90%                   | 92%                              | 85%                           | 90%                                             | 95%                                             |
| Prior myocardial infarction                       | 10%                   | NA                               | 12%                           | 20%                                             | 21%                                             |
| History of atrial fibrillation                    | 35%                   | NA                               | 51%                           | 42%                                             | 40%                                             |
| Atrial fibrillation on ECG                        | 17%                   | 5%                               | 37%                           | 34%                                             | 27%                                             |
| Hyperlipidemia                                    | 62%                   | 65%                              | 74%                           | 71%                                             | NA                                              |
| Diabetes mellitus                                 | 39%                   | 17%                              | 43%                           | 45%                                             | 41%                                             |
| Chronic obstructive lung disease                  | 15%                   | 3%                               | 19%                           | 16%                                             | NA                                              |
| Chronic kidney disease                            | 49%                   | NA                               | 55%                           | 48%                                             | 38%                                             |
| Loop diuretic                                     | 65%                   | NA                               | 77%                           | 75%                                             | NA                                              |
| Any diuretic                                      | 76%                   | 54%                              | 86%                           | 89%                                             | 100%                                            |
| ACE/ARB                                           | 64%                   | 77%                              | 70%                           | 79%                                             | 93%                                             |
| Beta blocker                                      | 70%                   | 72%                              | 76%                           | 79%                                             | 79%                                             |
| Aldosterone antagonist                            | 25%                   | NA                               | 11%                           | NA                                              | 19%                                             |
| Calcium channel blocker                           | 31%                   | 25%                              | 31%                           | 39%                                             | NA                                              |
| Statin                                            | 55%                   | NA                               | 64%                           | 65%                                             | NA                                              |
| <b>Laboratory and Echocardiographic variables</b> |                       |                                  |                               |                                                 |                                                 |
| NT-proBNP or BNP measured                         | All                   | All                              | All                           | Only if elevated*                               | All                                             |
| NT-proBNP – pg/ml                                 | 227                   | 158                              | 700                           | 900                                             | 828                                             |
| BNP – pg/ml                                       | NA                    | NA                               | NA                            | 234                                             | NA                                              |
| Ejection fraction - %                             | 64                    | 67                               | 60                            | 58                                              | 58                                              |
| Medial E/e' (Available in)                        | 14<br>(95%)           | 13<br>(100%)                     | 16<br>(87%)                   | 15<br>(21%)                                     | 12<br>(NA)                                      |
| LAVI – ml/m <sup>2</sup> (Available in)           | 37<br>(83%)           | 28<br>(100%)                     | 44<br>(69%)                   | 28<br>(33%)                                     | 35<br>(NA)                                      |

\*NT-proBNP (BNP) levels were only available in the 56% of patients who entered the study due to an elevated NT-proBNP (BNP). NT-proBNP (BNP) were not recorded in those who qualified for the study on the basis of a heart failure hospitalization.

Data are percent or median (NEAT-DHF, RELAX, TOPCAT) or mean (ALDO-DHF, PARAMOUNT) as available from quoted references or supplied by RELAX or TOPCAT investigators.

Abbreviations: ACE/ARB; angiotensin converting enzyme inhibitor or angiotensin receptor antagonist; KCCQ, Kansas City Cardiomyopathy Questionnaire (range 1-100); MLHFQ, Minnesota Living with Heart Failure Questionnaire (range 0-105); NYHA, New York Heart Association; Peak VO<sub>2</sub>, peak oxygen consumption at cardiopulmonary exercise test; E/e', ratio of early transmitral filling velocity to early diastolic medial mitral annular tissue velocity on Doppler examination; LAVI, left atrial volume/body surface area.

**FIGURE S1. THE NEAT-HFpEF ACCELEROMETER DEVICE**

Patients were supplied with an elastic, hip worn belt outfitted with two Kinetic Activity Monitors (KAMs, Kersh Health, Plano, Texas) containing high-sensitivity, tri-axis, silicon micro-machined accelerometers (model KXUD9-2050, Kionix, Ithaca, NY).

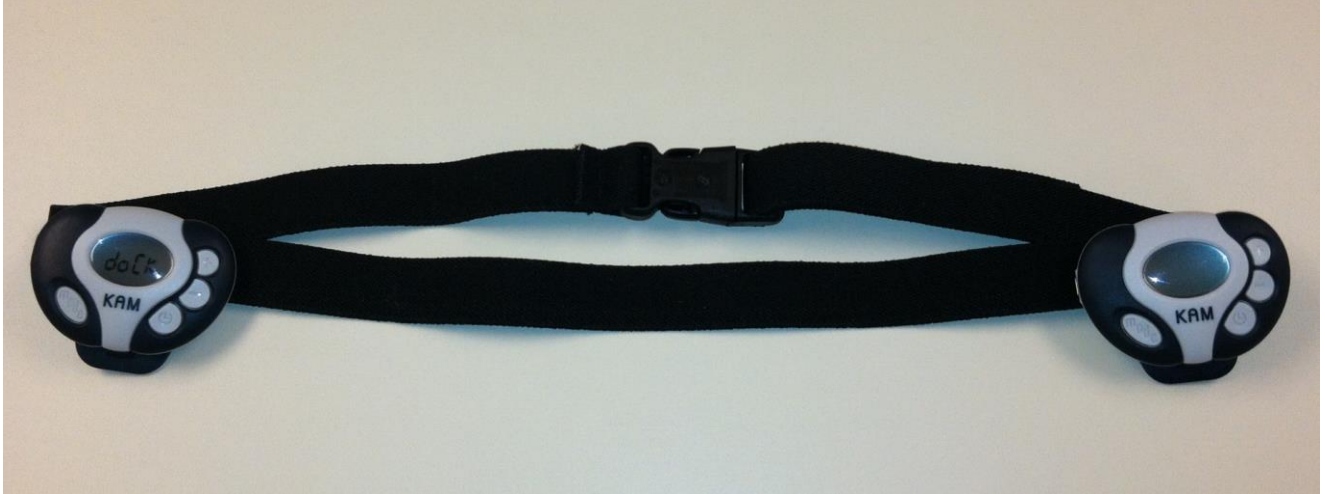

**FIGURE S2. CONSORT DIAGRAM AND STUDY DRUG ADMINISTRATION**

110 patients were enrolled at 20 sites (enrollment rate 0.9 patients/site/month)

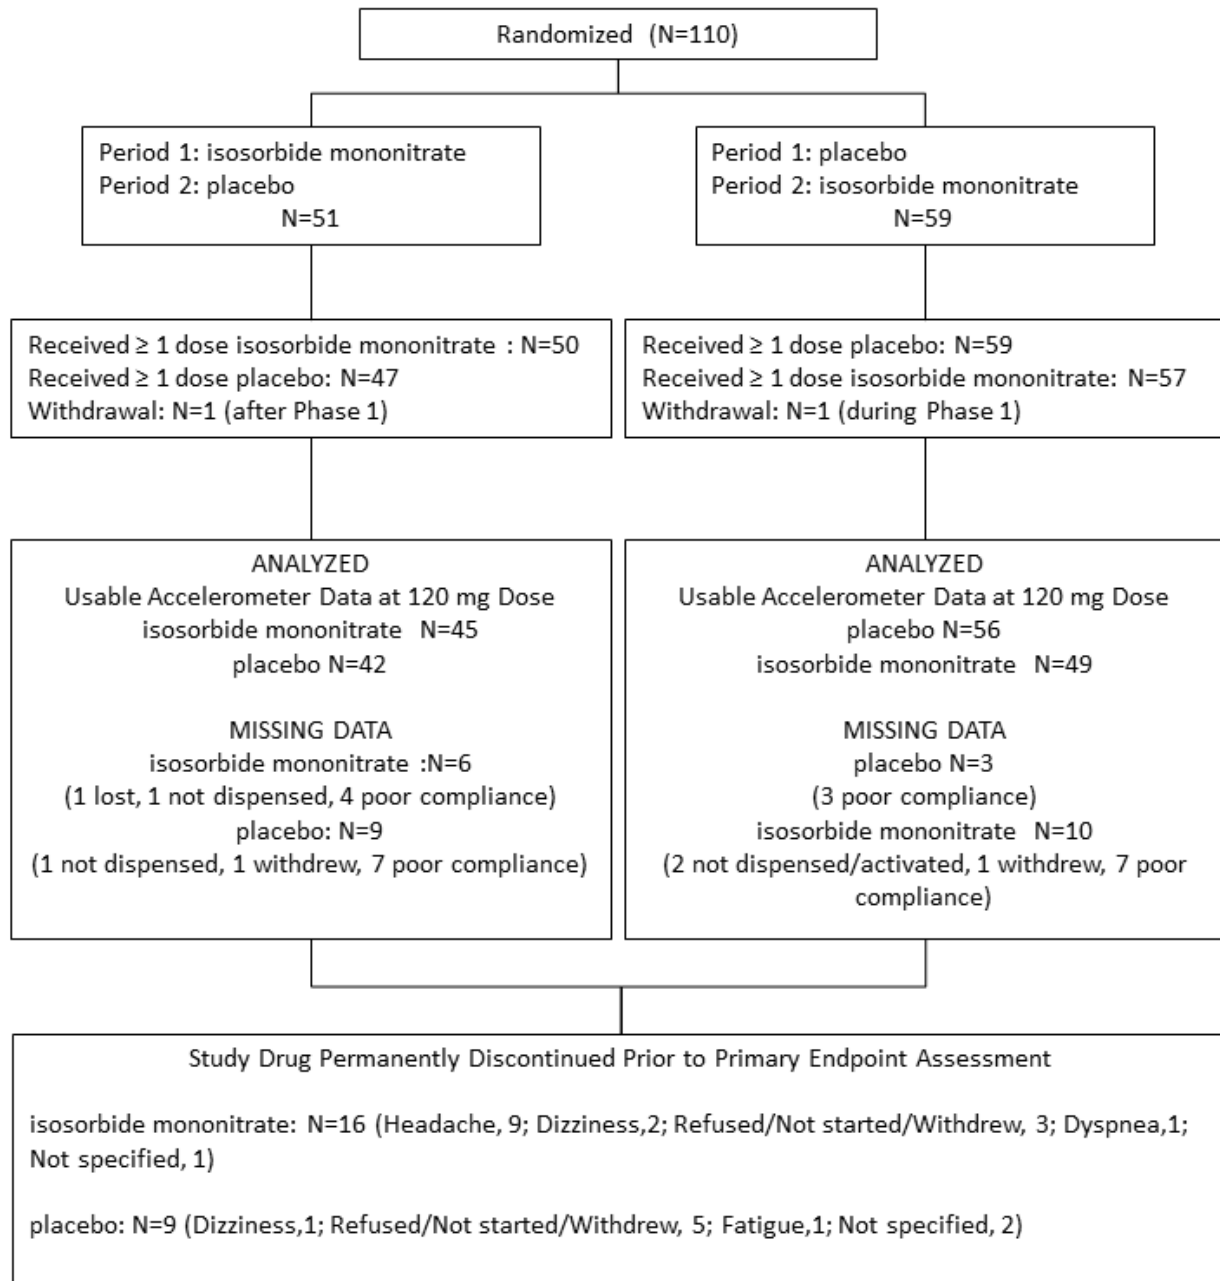

**FIGURE S3. CORRELATION BETWEEN THE TWO ACTIVITY MONITORS USED IN THE NEAT-HFpEF**

## ACCELEROMETER DEVICE

Two accelerometers were used to provide reproducibility data and help insure primary endpoint data availability in the case of a single device failure. During the primary endpoint data periods, there was excellent correlation between the two devices for the primary endpoint of average daily accelerometer units. When data were available from both accelerometers, the average of the two was used. Of the 220 potential primary endpoint periods, 192 had usable accelerometry data with 13 of these using data from only one accelerometer.

**Average Daily Accelerometry Units During the Primary Endpoint Phase of Periods 1 and 2**

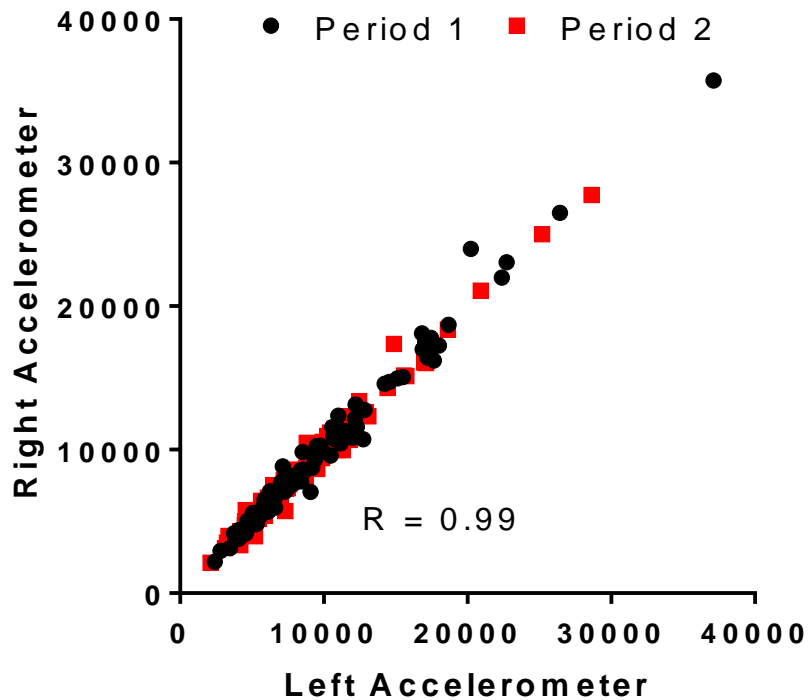

## SUPPLEMENTARY APPENDIX REFERENCES

1. Borlaug BA, Nishimura RA, Sorajja P, Lam CS, Redfield MM. Exercise hemodynamics enhance diagnosis of early heart failure with preserved ejection fraction. *Circ Heart Fail* 2010;3:588-95.
2. Anjan VY, Loftus TM, Burke MA, et al. Prevalence, clinical phenotype, and outcomes associated with normal B-type natriuretic peptide levels in heart failure with preserved ejection fraction. *Am J Card* 2012;110:870-6.
3. Edelmann F, Wachter R, Schmidt AG, et al. Effect of spironolactone on diastolic function and exercise capacity in patients with heart failure with preserved ejection fraction: the Aldo-DHF randomized controlled trial. *JAMA; J Am Med Assoc* 2013;309:781-91.
4. Redfield MM, Chen HH, Borlaug BA, et al. Effect of Phosphodiesterase-5 Inhibition on Exercise Capacity and Clinical Status in Heart Failure With Preserved Ejection Fraction: A Randomized Clinical Trial. *JAMA; J Am Med Assoc* 2013:1-10.
5. Pfeffer MA, Claggett B, Assmann SF, et al. Regional variation in patients and outcomes in the Treatment of Preserved Cardiac Function Heart Failure With an Aldosterone Antagonist (TOPCAT) trial. *Circ* 2015;131:34-42.
6. Solomon SD, Zile M, Pieske B, et al. The angiotensin receptor neprilysin inhibitor LCZ696 in heart failure with preserved ejection fraction: a phase 2 double-blind randomised controlled trial. *Lancet* 2012;380:1387-95.
